# 1 mobileOG-db: a manually curated database of protein families 2 mediating the life cycle of bacterial mobile genetic elements

3 Connor L. Brown<sup>1</sup>, James Mullet<sup>2</sup>, Fadi Hindi<sup>2</sup>, James E. Stoll<sup>3</sup>, Suraj Gupta<sup>1</sup>, Minyoung Choi<sup>2</sup>, Ishi  
4 Keenum<sup>2</sup>, Peter Vikesland<sup>2</sup>, Amy Pruden<sup>\*2</sup>, Liqing Zhang<sup>\*4</sup>

5  
6 <sup>1</sup>Genetics, Bioinformatics, and Computational Biology, Virginia Tech, Blacksburg, VA, 24061, USA

7 <sup>2</sup>Civil and Environmental Engineering, Virginia Tech, Blacksburg, VA, 24061, USA

8 <sup>3</sup>Fralin Life Science Institute, Blacksburg, VA, 24061, USA

9 <sup>4</sup>Computer Science, Virginia Tech, Blacksburg, VA, 24061, USA

10  
11 \* To whom correspondence should be addressed. Tel: 1-540/231-6635 Fax: 540/231-7532  
12 Fax: 540/231-7532; Email: [apruden@vt.edu](mailto:apruden@vt.edu), [lqzhang@vt.edu](mailto:lqzhang@vt.edu)

## 13 14 **ABSTRACT**

15 Currently available databases of bacterial mobile genetic elements (MGEs) contain both  
16 “core” and accessory MGE functional modules, the latter of which are often only transiently  
17 associated with the element. The presence of these accessory genes, which are often close  
18 homologs to primarily immobile genes, limits the usability of these databases for MGE annotation. To  
19 overcome this limitation, we analysed 10,776,212 protein sequences derived from seven MGE  
20 databases to compile a comprehensive database of 6,140 manually curated protein families that are  
21 linked to the “life cycle” (integration, excision, replication/recombination/repair, transfer, and  
22 stability/defense) of all major classes of bacterial MGEs. We overlay experimental information where  
23 available to create a tiered annotation scheme of high-quality annotations and annotations inferred  
24 exclusively through bioinformatic evidence. We additionally provide an MGE-class label for each entry  
25 (e.g., plasmid, integrative element) derived from the source database, and assign a list of keywords to  
26 each entry to delineate different MGE functional modules and to facilitate annotation. The resulting  
27 database, mobileOG-db (for mobile orthologous groups), provides a simple and readily interpretable  
28 foundation for an array of MGE- centred analyses. mobileOG-db can be accessed at  
29 [mobileogdb.flsi.cloud.vt.edu/](http://mobileogdb.flsi.cloud.vt.edu/), where users can browse and design, refine, and analyse custom  
30 subsets of the dynamic mobilome.

## 31 **INTRODUCTION**

32 Prokaryotic genomes undergo frequent interactions with mobile genetic elements (MGEs)  
33 including plasmids, bacteriophages, insertion sequences, and other integrative elements (IGEs).  
34 These interactions can confer beneficial or detrimental properties to the organism (1), and in some  
35 cases appear to have little impact on the organism at all (2). Of particular importance to public health,  
36 bacterial MGEs can function as key vehicles for the proliferation of antimicrobial resistance (AMR),  
37 which is now pandemic in many clinically-significant bacteria (3). Emerging efforts aimed at  
38 developing frameworks for predicting the emergence of novel antibiotic resistance genes (ARGs),  
39 whose products confer AMR in bacteria, have identified associations with MGEs as a key indicator of  
40 a potential novel ARG (4).

41 While there are many tools and databases available for annotating mobile genetic elements  
42 (7–10), there is at present no centralized resource for mobile genetic element “hallmark” genes which  
43 can serve as the basis for annotating diverse classes of MGEs, such as is aggregated by pVOG (11)  
44 for phages. However, even pVOG includes many primarily cellular genes (11, 12), which they identify  
45 based on the frequency of occurrence in phages relative to the occurrence in cellular genome  
46 sequences. Similarly, public databases of full length mobile genetic elements, such as ACLAME (6) or  
47 ICEBerg (13), comprise both core and accessory MGE genes. While such databases are highly  
48 informative, the presence of these cargo genes leads to frequent occurrences of false-positive hits  
49 that confound and complicate the annotation of MGEs (14). In sum, the presence of these cargo  
50 genes creates the need for extensive expertise and research to detect, analyse, and annotate diverse  
51 types of mobile genetic elements in biological data. This is a key obstacle particularly for antibiotic  
52 resistance research, where knowledge of the carriage of ARGs on MGEs is highly valuable towards  
53 identifying mobile ARGs. (15).

54 To facilitate MGE annotation, we propose the mobile orthologous groups database and  
55 webserver (mobileOG-db), an interactive resource compiling knowledge encompassing a  
56 comprehensive variety of proteins mediating the essential functions of all major classes of bacterial  
57 MGEs. Here we define the essential functions or “life cycle” of MGEs as (1) integration and excision  
58 (IE) from one genetic locus to another; (2) replication, recombination, or repair (RRR) of element  
59 nucleic acid; (3) inter-organism transfer (T); (4) element stability, transfer or defense (STD); and (5)  
60 phage (P) related biological processes (e.g., genome packaging, or lysis and lysogeny). These

61 functions are essential to the persistence of MGEs as independent elements and are orchestrated by  
62 an extremely diverse assortment of proteins (16) that we deem suitable as candidate “hallmarks”  
63 because of the key roles that they play. Thus, the precise detection of these protein coding genes can  
64 serve as the basis for the discovery, classification, and characterization of diverse MGEs in a simple  
65 and intuitive way.

## 66 MATERIAL AND METHODS

### 67 Aggregation of a draft pan-mobilome and gene name assignment

68 A pan-mobilome, i.e., an extensive collection of sequences comprising diverse MGEs, was  
69 created by merging sequences produced from seven publicly-available MGE-databases into a single  
70 database of protein sequences: ICEBerg 2.0 (13), COMPASS (17), NCBI Plasmid RefSeq Gut Phage  
71 Database (18), ISfinder (19), ACLAME (6) and immedb (20). The genomes comprising the basis for  
72 the pVOG database (11) and COMPASS, a collection of exclusively nucleotide sequences, were  
73 processed with prodigal (v2.6.3) (21) to generate open reading frames using the -p meta setting. The  
74 final aggregated dataset included 10,776,849 sequences, or 2,649,813 sequences dereplicated at  
75 97% identity and 80% query coverage (Fig. 1). The 10,776,749 proteins were searched against  
76 UniProt (downloaded in the fall of 2020) using diamond blastp, with minimum identity 90% and  
77 minimum query coverage of 80% cut-offs. This yielded 8,460,321 matches to UniProt. The 8,460,321  
78 proteins were then used to parse a merged Bacterial, Archaeal, and viral UniProt knowledge base  
79 (.dat file) with a custom script (available on the project GitHub page, [github.com/clb21565/mobileOG-](https://github.com/clb21565/mobileOG-db/scripts)  
80 [db/scripts](https://github.com/clb21565/mobileOG-db/scripts)) to extract gene names yielding 110,234 gene names matched to UniProt entries; 20,979 of  
81 the 110,234 gene names were unique.

### 82 Manual curation and annotation of the mobileOG-db

83 The 20,979 unique gene names were augmented to prepare queries for searching against the MGE  
84 abstract database (Supplementary Methods, Table S1). The MGE abstract database was searched  
85 using the unique queries and a resulting 8,372 gene name-abstract pairs were manually inspected by  
86 at least two researchers. Sequences were manually curated and provided a functional annotation by  
87 comparing the abstract text to the putative function reported within each UniProt or NCBI entry (Fig 1).  
88 Because the same gene name can be attributed to multiple UniProt entries, sequence entities were  
89 annotated on the basis of their 40% identity 50% query/subject coverage (mmseqs easy-clust -c 0)  
90 cluster. If the cluster representative had a putative function inconsistent with the attributing abstract(s)  
91 (Supplementary Methods), the sequence was reannotated with a review of literature recovered by  
92 searching for the gene name and putative function in PubMed. To improve coverage, keyword  
93 matches in the fasta headers with a table of MGE protein keywords (Table S2) was used as evidence  
94 for inclusion in mobileOG-db. The evidence used to determine inclusion in mobileOG-db (manual  
95 curation, homology, or keyword searches) is recorded in mobileOG-db. Examples of our rationale are  
96 provided in Supplementary Methods. Last, sequences with matches to SwissProt entries were  
97 considered a special case and were manually curated regardless of whether they were returned  
98 during the abstract analysis. The gene names, queries, and the abstract database, are available at  
99 the FigShare project (<https://doi.org/10.6084/m9.figshare.15170736>).

## 100 RESULTS

### 101 Catalogue of the mobile orthologous groups database

102 mobileOG-db consists of five major functional categories (P, RRR, STD, T, and IE) and  
103 numerous minor categories, providing intuitive interpretation of search and filter terms. Starting with a  
104 pan-mobilome of 10,776,213 proteins derived from ICEBerg, ACLAME, NCBI Plasmid RefSeq,  
105 COMPASS, immedb, and ISfinder, we identified proteins performing the defining functions of phages,  
106 IGEs, plasmids, and insertion sequences. Owing to the extensive curation effort, a key advance  
107 achieved in the present database is its delineation of major and minor mobileOG categories that  
108 compose complex elements (Fig. 2A). For example, the *Shigella flexneri* plasmid R100 is displayed  
109 with different functional modules coloured by our mobileOG categories (Fig. 2A). There is a prominent  
110 RRR module (including *repA*); T: conjugation module (including *finO*); and two transposons (Tn21 and  
111 Tn10) dense with IE module protein-coding genes. Altogether, this first release of mobileOG-db  
112 (beatrix) comprises 823,797 dereplicated proteins including over 29,000 derived directly from  
113 manually curated entries; 6,140 protein clusters or families (defined as greater than 40% identical  
114 over 50% of the subject and query length, see methods); 2,444 unique manual annotations, and  
115 1,393 references (Fig. 2B).

### 116 Usage recommendations and examples

117 For detecting and classifying elements from long genomic segments (i.e., long reads or  
118 assembled short reads), it is recommended that an accurate annotation consists of multiple co-  
119 localized hits in close proximity, similar to the pattern-based co-localization approach leveraged by  
120 ICEBerg (5) for IGE discovery. Likewise, it is noted that hits solely to RRR modules are not

121 necessarily indicative of an MGE; plasmids and phages frequently encode homologs of RRR  
122 machinery (22) that are also present in exclusively cellular DNA. An additional caveat is that hits to  
123 type four secretion systems may not be indicative of a MGE; paralogues of these proteins are also  
124 virulence determinants in some organisms (23). A preliminary annotation pipeline has been  
125 developed (Supplementary Methods, Table S1) to allow for automated element annotation  
126 (Supplementary Methods). Usage of mobileOG-db enabled successful classification of up to 98.2%  
127 and 99.7% of the plasmids and phages, respectively, comprising a test dataset  
128 (<https://doi.org/10.6084/m9.figshare.15170736>, Table S3) of genomes in the COMPASS or the  
129 GutPhage databases. Other uses might include the creation of quantitative metrics for horizontal gene  
130 transfer hypothesis testing (Fig S3).

131 The mobileOG-db web portal provides a user-friendly interface for scientists across relevant  
132 fields intersecting the Life Sciences to browsing and customizing datasets of MGE proteins (Fig. 2C).  
133 Usage of the website allows users to select different major and minor mobileOG categories to hone  
134 their experimental design or intended usage. Further, the ability to filter and select from different  
135 element-types allow for the user to identify genes that occur across different element types. For  
136 instance, users could select experimentally validated insertion sequence proteins that also occur on  
137 plasmids, a key route for the horizontal transmission of ARGs (24).

### 138 **DISCUSSION**

139 The creation of mobileOG-db was motivated by a lack of an up-to-date and comprehensive  
140 resource for markers of diverse classes of MGEs. Here, using a layered annotation scheme, we  
141 analysed 10,776,212 MGE-encoded proteins to differentiate sequences that are anticipated to be  
142 informative for annotation from those that are not defensible for this purpose from a biological  
143 standpoint. Importantly, we recognize that the annotation framework implemented here cannot  
144 produce a highly granular description of MGE function. However, providing such a resource for every  
145 major class of bacterial MGEs is far beyond the scope of the present work and, in addition to  
146 uncertainty of protein function, element-specific resources are available that form the basis for  
147 mobileOG-db. Instead, mobileOG-db provides a “Swiss Army knife” that can serve as the foundation  
148 for an array of analyses, which can be designed, customized, and refined using the web service.

149 Looking towards the future, the delineation of MGE functional modules and conserved protein  
150 families could potentially support probabilistic methods for clustering, annotating, and classifying  
151 MGEs. Such frameworks could also provide a basis for other analyses leveraging compositional and  
152 structural features of the elements to quantitatively estimate potential host-linkages, cargo, and the  
153 potential for transmission to clinically relevant pathogens. These analyses are being developed for  
154 inclusion in a future release of mobileOG-db and show promise for harnessing large scale genomic  
155 data for predictive public health insights.

### 156 **DATA AVAILABILITY**

157 mobileOG-db is available at [mobileogdb.flsi.cloud.vt.edu/](https://mobileogdb.flsi.cloud.vt.edu/), where users can browse, filter, search, and  
158 download customized datasets and references. Scripts used in the text mining analysis and two  
159 example pipelines using R or Python are available at [https://github.com/clb21565/mobileOG-](https://github.com/clb21565/mobileOG-db/scripts)  
160 [db/scripts](https://github.com/clb21565/mobileOG-db/scripts).

### 161 **SUPPLEMENTARY DATA**

162 Supplementary Data are available at NAR online and the manuscript FigShare repository  
163 <https://doi.org/10.6084/m9.figshare.15170736>.

### 164 **ACKNOWLEDGEMENT**

165 We would like to directly express our appreciation for the work and expertise that went into designing  
166 the databases making up mobileOG-db. The authors acknowledge the Advanced Research  
167 Computing at Virginia Tech for providing computational resources.

### 168 **FUNDING**

169 This study was supported by NSF PIRE (PI Vikesland) Award 1545756, NSF CI4WARS (PI  
170 Zhang) Award 2004751, USDA National Institute of Food and Agriculture competitive Grant 2017-  
171 68003-26498, Water Research Foundation Project 4961, the Genetics, Bioinformatics, and  
172 Computational Biology Interdisciplinary Graduate Education Program (IGEP), the Virginia Tech  
173 Sustainable NanoTechnology IGEP, NanoEarth, Fralin Life Sciences Institute, the Virginia Tech Open  
174 Access Support Fund, and the Virginia Tech ICTAS Center for Science and Engineering of the  
175 Exposome.

### 176 **CONFLICT OF INTEREST**

177 The authors report no conflicts of interest.

### 178 **REFERENCES**

179 1. Rankin, D.J., Rocha, E.P.C. and Brown, S.P. (2011) What traits are carried on mobile genetic  
180 elements, and why. *Heredity (Edinb)*, **106**, 1–10.

- 181 2. Berg, O.G. and Kurland, C.G. (2002) Evolution of microbial genomes: Sequence acquisition and  
182 loss. *Mol. Biol. Evol.*, **19**, 2265–2276.
- 183 3. Partridge, S.R., Kwong, S.M., Firth, N. and Jensen, S.O. (2018) Mobile genetic elements associated  
184 with antimicrobial resistance. *Clin. Microbiol. Rev.*, **31**.
- 185 4. Ellabaan, M.M.H., Munck, C., Porse, A., Imamovic, L. and Sommer, M.O.A. (2021) Forecasting the  
186 dissemination of antibiotic resistance genes across bacterial genomes. *Nat. Commun.*, **12**, 1–10.
- 187 5. Liu, M., Li, X., Xie, Y., Bi, D., Sun, J., Li, J., Tai, C., Deng, Z. and Ou, H.Y. (2019) ICEberg 2.0: An  
188 updated database of bacterial integrative and conjugative elements. *Nucleic Acids Res.*, **47**,  
189 D660–D665.
- 190 6. Leplae, R., Lima-Mendez, G. and Toussaint, A. (2009) ACLAME: A CLAssification of mobile genetic  
191 elements, update 2010. *Nucleic Acids Res.*, **38**.
- 192 7. Roux, S., Enault, F., Hurwitz, B.L. and Sullivan, M.B. (2015) VirSorter: Mining viral signal from  
193 microbial genomic data. *PeerJ*, **2015**, e985.
- 194 8. Krawczyk, P.S., Lipinski, L. and Dziembowski, A. (2018) PlasFlow: predicting plasmid sequences in  
195 metagenomic data using genome signatures. *Nucleic Acids Res.*, **46**, e35.
- 196 9. Orlek, A., Stoesser, N., Anjum, M.F., Doumith, M., Ellington, M.J., Peto, T., Crook, D., Woodford, N.,  
197 Sarah Walker, A., Phan, H., *et al.* (2017) Plasmid classification in an era of whole-genome  
198 sequencing: Application in studies of antibiotic resistance epidemiology. *Front. Microbiol.*, **8**, 1–  
199 10.
- 200 10. Carr, V.R., Shkoporov, A., Hill, C., Mullany, P. and Moyes, D.L. (2021) Probing the Mobilome:  
201 Discoveries in the Dynamic Microbiome. *Trends Microbiol.*, **29**, 158–170.
- 202 11. Grazziotin, A.L., Koonin, E. V. and Kristensen, D.M. (2017) Prokaryotic Virus Orthologous Groups  
203 (pVOGs): A resource for comparative genomics and protein family annotation. *Nucleic Acids*  
204 *Res.*, **45**, D491–D498.
- 205 12. Pfeifer, E., Moura De Sousa, J.A., Touchon, M. and Rocha, E.P.C. (2021) Bacteria have numerous  
206 distinctive groups of phage-plasmids with conserved phage and variable plasmid gene  
207 repertoires. *Nucleic Acids Res.*, **49**, 2655–2673.
- 208 13. Liu, M., Li, X., Xie, Y., Bi, D., Sun, J., Li, J., Tai, C., Deng, Z. and Ou, H.Y. (2019) ICEberg 2.0: An  
209 updated database of bacterial integrative and conjugative elements. *Nucleic Acids Res.*, **47**,  
210 D660–D665.
- 211 14. Slizovskiy, I.B., Mukherjee, K., Dean, C.J., Boucher, C. and Noyes, N.R. (2020) Mobilization of  
212 Antibiotic Resistance: Are Current Approaches for Colocalizing Resistomes and Mobilomes  
213 Useful? *Front. Microbiol.*, **11**, 1376.
- 214 15. Partridge, S.R., Kwong, S.M., Firth, N. and Jensen, S.O. (2018) Mobile genetic elements associated  
215 with antimicrobial resistance. *Clin. Microbiol. Rev.*, **31**.
- 216 16. Craig, N.L. (2015) A Moveable feast: An introduction to mobile DNA. In *Mobile DNA III*. Wiley, pp.  
217 3–39.
- 218 17. Douarre, P.E., Mallet, L., Radomski, N., Felten, A. and Mistou, M.Y. (2020) Analysis of COMPASS, a  
219 New Comprehensive Plasmid Database Revealed Prevalence of Multireplicon and Extensive  
220 Diversity of IncF Plasmids. *Front. Microbiol.*, **11**, 483.
- 221 18. Camarillo-Guerrero, L.F., Almeida, A., Rangel-Pineros, G., Finn, R.D. and Lawley, T.D. (2021)  
222 Massive expansion of human gut bacteriophage diversity. *Cell*, **184**, 1098–1109.e9.
- 223 19. Siguier, P., Perochon, J., Lestrade, L., Mahillon, J. and Chandler, M. (2006) ISfinder: the reference  
224 centre for bacterial insertion sequences. *Nucleic Acids Res.*, **34**.
- 225 20. Jiang, X., Hall, A.B., Xavier, R.J. and Alm, E.J. (2019) Comprehensive analysis of chromosomal  
226 mobile genetic elements in the gut microbiome reveals phylum-level niche-adaptive gene pools.  
227 *PLoS One*, **14**, e0223680.
- 228 21. Hyatt, D., Chen, G.L., LoCascio, P.F., Land, M.L., Larimer, F.W. and Hauser, L.J. (2010) Prodigal:  
229 Prokaryotic gene recognition and translation initiation site identification. *BMC Bioinformatics*, **11**,  
230 119.
- 231 22. Chen, S.H., Byrne, R.T., Wood, E.A. and Cox, M.M. (2015) Escherichia coli radD(yejH) gene: A  
232 novel function involved in radiation resistance and double-strand break repair. *Mol. Microbiol.*,  
233 **95**, 754–768.
- 234 23. Costa, T.R.D., Harb, L., Khara, P., Zeng, L., Hu, B. and Christie, P.J. (2021) Type IV secretion  
235 systems: Advances in structure, function, and activation. *Mol. Microbiol.*, **115**, 436–452.
- 236 24. Che, Y., Yang, Y., Xu, X., Brinda, K., Polz, M.F., Hanage, W.P. and Zhang, T. (2021) Conjugative  
237 plasmids interact with insertion sequences to shape the horizontal transfer of antimicrobial  
238 resistance genes. *Proc. Natl. Acad. Sci. U. S. A.*, **118**.
- 239

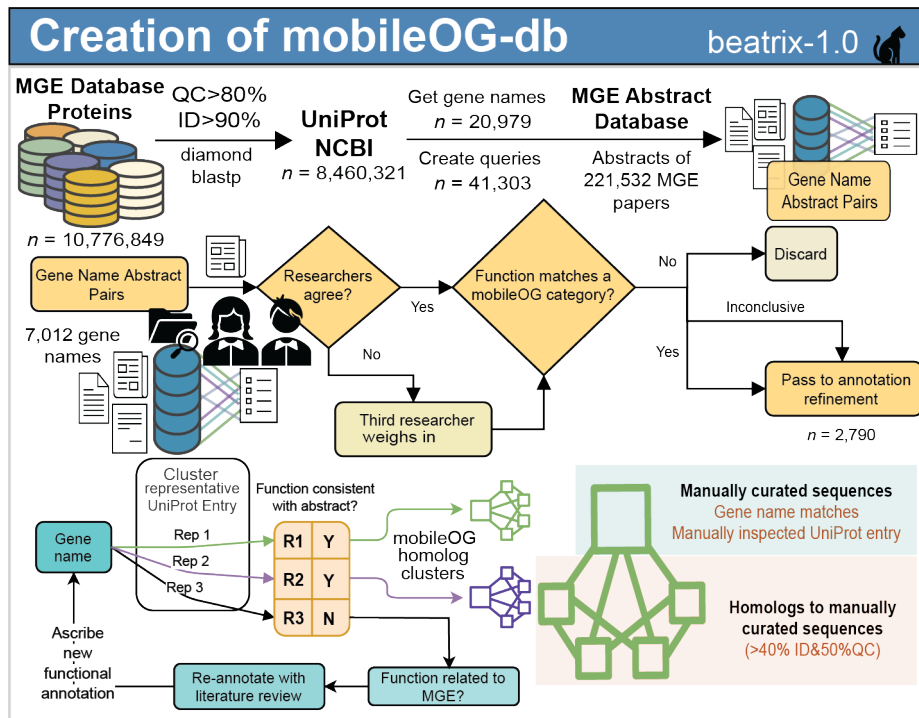

240  
241  
242  
243  
244  
245  
246  
247  
248  
249  
250  
251  
252  
253  
254  
255  
256  
257  
258  
259  
260  
261  
262  
263  
264  
265  
266  
267  
268  
269  
270  
271  
272  
273  
274  
275  
276  
277

Figure 1. Construction of the mobile orthologous groups database (mobileOG-db). Publicly- available MGE database were downloaded, and their contents mapped to the UniProt TrEMBL/SwissProt knowledge base. Gene names were searched against a filtered database of MGE-related abstracts. 7,012 gene name pairs were then manually inspected by at least two researchers to determine whether the identified gene encoded a protein with a role in one of the target mobileOG categories (replication/recombination/repair, stability/transfer/defence, integration/excision, phage, transfer). A total of 2,790 manually- curated gene names were passed to annotation refinement, where names were paired with UniProt/NCBI entries and associated metadata. To reduce the number of manual curation events needed, we selected one representative sequence for each cluster (40% identity over 50% of reference length using mmseqs2) with a given gene name and compared their database-derived putative function with literature descriptions of the proteins recovered from the abstract analysis. If the UniProt/NCBI entry did not support a link between the gene name and function, the protein was annotated with a literature review.
